# Supplementary material
Source: PubMed Central journal article supplement (PMC7965937)
Supplement: 4072_materials.pdf [file 4072_materials.pdf]

**On-line Table: Conventional structural MRI and fiber tract assessment in the patient group with unilateral spastic cerebral palsy organized according to the pattern of damage<sup>a</sup>**

| Patient No. | Pattern of Damage | Location of Abnormality |               |         | Extent of WM Damage | FTA     |         |
|-------------|-------------------|-------------------------|---------------|---------|---------------------|---------|---------|
|             |                   | Hemisphere              | GM            | WM      |                     | TRS1    | CST     |
| 16          | MD                | B (R>L)                 | Cortex, T     | –       | –                   | R: S, D | R: S, D |
| 10          | WMDI              | B (R = L) <sup>b</sup>  | –             | M       | Gliosia only        | –       | –       |
| 3           | WMDI              | L                       | –             | M       | Mild/moderate       | –       | L: S    |
| 8           | WMDI              | R                       | –             | M       | Mild/moderate       | –       | –       |
| 9           | WMDI              | L                       | –             | M       | Mild/moderate       | L: S    | L: S, D |
| 13          | WMDI              | B (R>L)                 | –             | A, M, P | Mild/moderate       | –       | R: C    |
| 19          | WMDI              | B (R<L)                 | –             | A, M, P | Mild/moderate       | –       | –       |
| 5           | WMDI              | L                       | T             | M       | Mild/moderate       | –       | R: S    |
| 12          | WMDI              | B (R>L)                 | T             | M, P    | Severe              | R: X    | R: D    |
| 4           | WMDI              | R                       | BG, T         | A, M    | Severe              | R: X    | R: X    |
| 11          | WMDI              | R                       | BG, T         | A, M, P | Severe              | R: X    | R: X    |
| 15          | FI                | L                       | Cortex only   | –       | –                   | –       | –       |
| 20          | FI                | L                       | BG            | –       | –                   | –       | –       |
| 17          | FI                | R                       | BG, T         | M       | Gliosia only        | R: S    | R: X    |
| 14          | FI                | L                       | Cortex, BG, T | A, M    | Severe              | L: X    | L: C    |

**Note:**—R indicates right; L, left; B, bilateral; BG, basal ganglia; T, thalamus; A, anterior; M, medial; P, posterior; MD, maldevelopment; WMDI, white matter damage of immaturity; FI, focal infarct; Atypical FTA is denoted as D, dislocation; S, local split; C, compaction; or X, failure to the delineate tract.

<sup>a</sup> Conventional structural MRIs were visually assessed for lesion type (MD, WMDI, and FI), lesion location, and damage extent. The extent of periventricular WM damage was classified as mild/moderate and severe if <50% and >50%, respectively, of the bulk periventricular WM was reduced. Abnormally high signal on T2-weighted FLAIR images in the periventricular WM was considered gliosis.

<sup>b</sup> Bilateral lesions with equal affection. The lesion side was determined to be ipsilateral to the dominant hand (right).

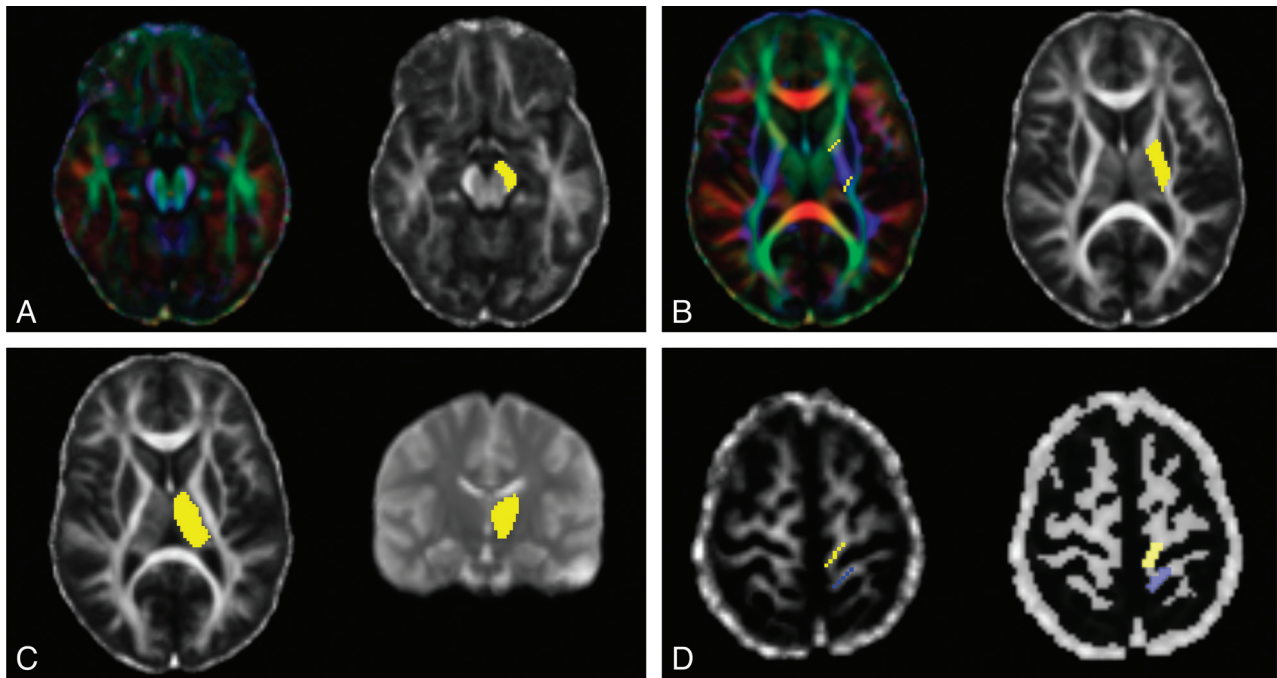

**ON-LINE FIG.** Region-of-interest definition in template space. A, ROIs (yellow) of the cerebral peduncles are defined on the FA template (*right*) in the section above the decussation of the superior cerebellar peduncle (*left*). B, ROIs (yellow) of the PLIC are outlined on the color-coded FA template (*left*) and defined on the FA template (*right*). C, ROIs (yellow) of the thalami are delineated with lateral borders according to the FA template (*left*) and with medial/ventricular borders on the  $b=0$  template (*right*). These were adjusted by repeated refinements in all planes. D, ROIs for the M1 (yellow) and the somatosensory cortex (blue) are identified as the pre- and postcentral gyri over several sections by drawing guiding voxels on the FA template (*left*) laterally past the “hand knob.” Their extents were defined on the FA template thresholded at  $FA \geq 0.2$  (*right*).
